# Supplementary material for: Degradation of Tocopherol Molecules and Its Impact on the Polymerization of Triacylglycerols during Heat Treatment of Oil
Source: MDPI journal article supplement (doi:10.3390/molecules24244555), 2019-12-12
Supplement: s1 [file s1]

Supplementary Materials

# Degradation of tocopherols molecules and its impact on the polymerization of triacylglycerols during heat treatment of oil

Dominik Kmiecik<sup>1,\*</sup>, Monika Fedko<sup>2</sup>, Aleksander Siger<sup>3</sup>, Bartosz Kulczyński<sup>4</sup>

<sup>1</sup> Department of Gastronomy Science and Functional Food, Faculty of Food Science and Nutrition, Poznan University of Life Sciences, Wojska Polskiego 31, 60-634 Poznan, Poland; dominik.kmiecik@up.poznan.pl

<sup>2</sup> Department of Gastronomy Science and Functional Food, Faculty of Food Science and Nutrition, Poznan University of Life Sciences, Wojska Polskiego 31, 60-634 Poznan, Poland; monika.fedko@up.poznan.pl

<sup>3</sup> Department of Food Biochemistry and Analysis, Faculty of Food Science and Nutrition, Poznan University of Life Sciences, Wojska Polskiego 31, 60-634 Poznan, Poland; aleksander.siger@up.poznan.pl

<sup>4</sup> Department of Gastronomy Science and Functional Food, Faculty of Food Science and Nutrition, Poznan University of Life Sciences, Wojska Polskiego 31, 60-634 Poznan, Poland; bartosz.kulczynski@up.poznan.pl

\* Correspondence: dominik.kmiecik@up.poznan.pl

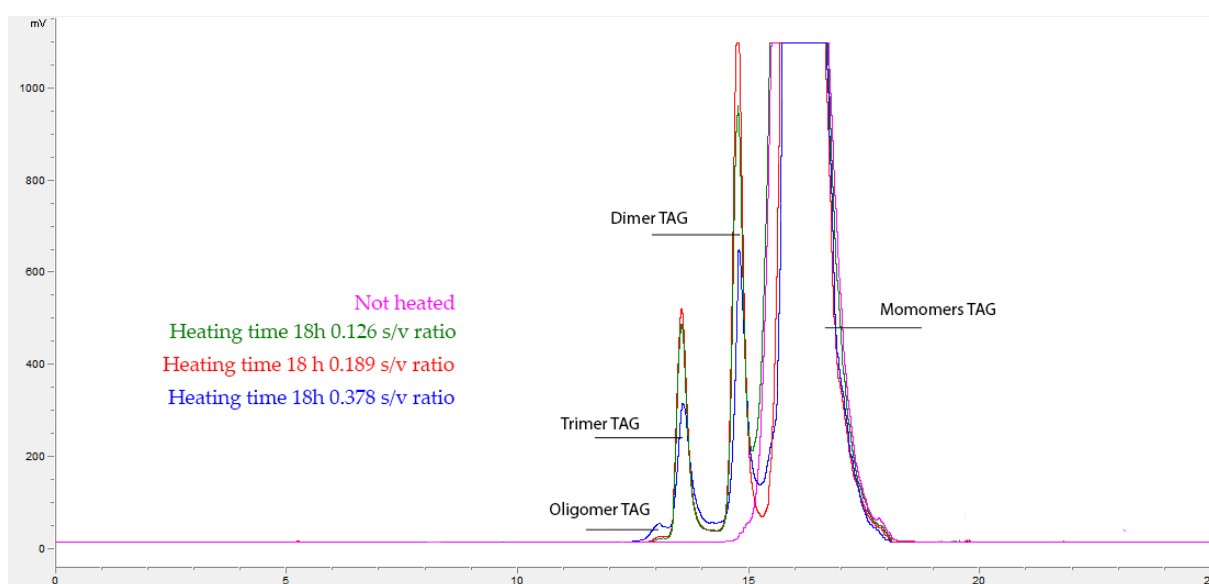

**Figure S1.** HPLC chromatogram of triacylglycerols polymers composition changes in rapeseed oil heated with a different surface area to volume ratio (0.378, 0.189, and 0.126 cm<sup>-1</sup>).

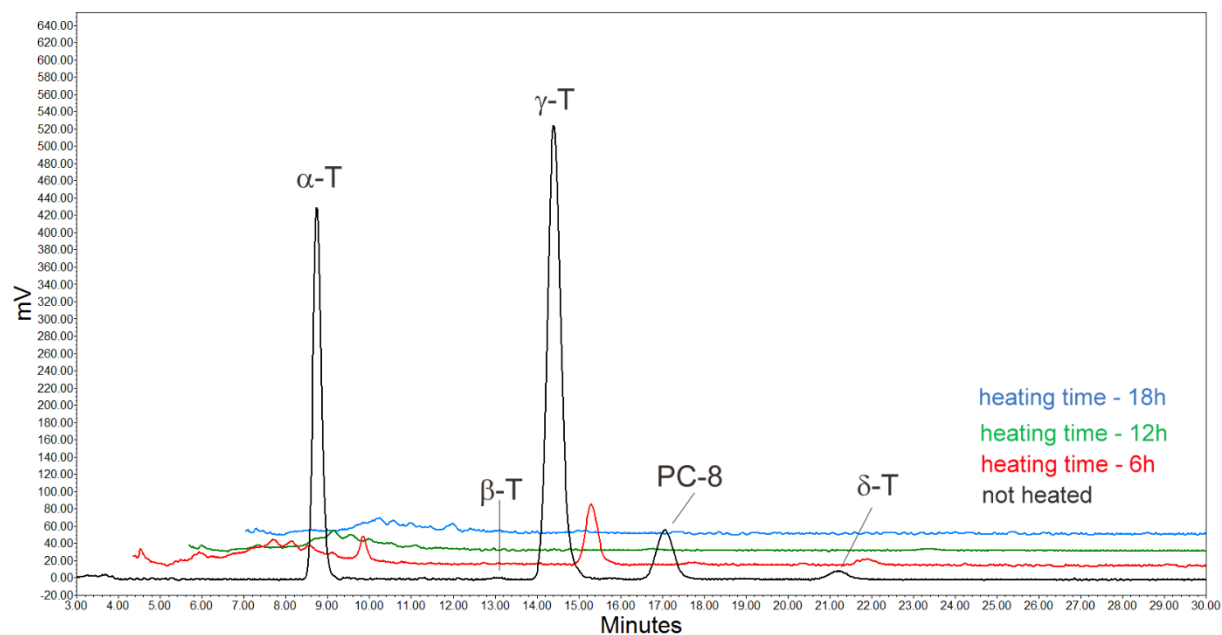

**Figure S2.** HPLC chromatogram of tocopherols composition changes in rapeseed oil heated at different times (6, 12, and 18 h).

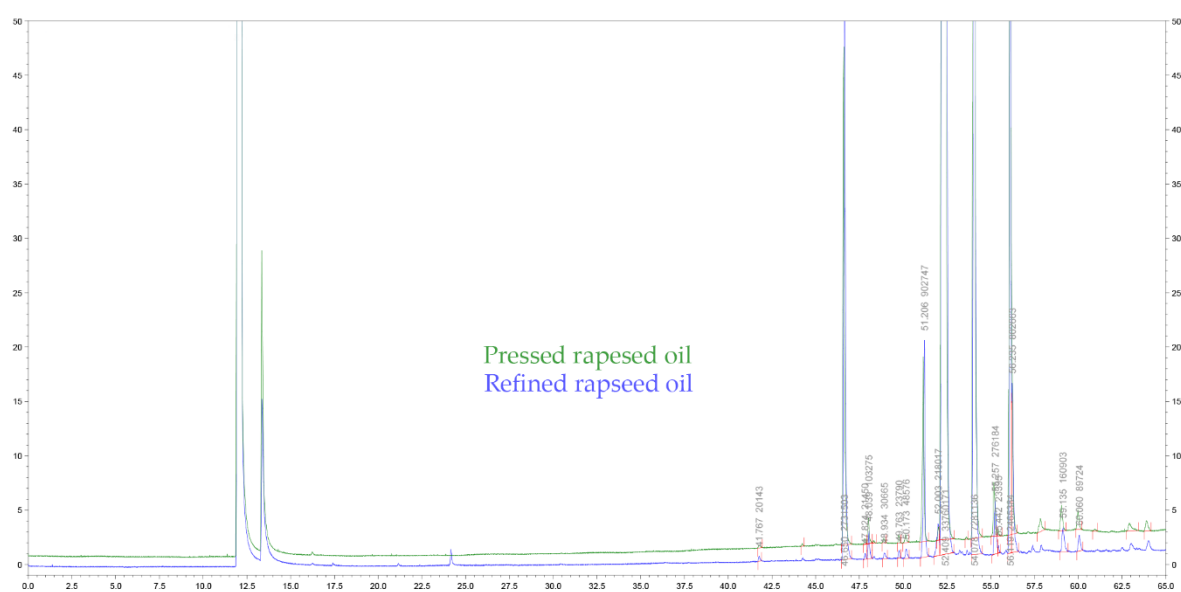

**Figure S3.** GC chromatogram of fresh pressed and refined rapeseed oil.
